# Supplementary material for: Modeling SNP array ascertainment with Approximate Bayesian Computation for demographic inference
Source: PubMed Central journal article supplement (PMC6033855; doi:10.1038/s41598-018-28539-y), 2018-07-05
Supplement: 41598_2018_28539_MOESM5_ESM.pdf [file 41598_2018_28539_MOESM5_ESM.pdf]

## 1 Supplemental Methods

### 2 Modeling SNP array ascertainment with Approximate Bayesian Computation for demo- 3 graphic inference

4 Consuelo D. Quinto-Cortés<sup>1,\*</sup>, August E. Woerner<sup>2</sup>, Joseph C. Watkins<sup>3</sup> and Michael F. Hammer<sup>4,\*</sup>

5  
6 <sup>1</sup>National Laboratory of Genomics for Biodiversity (LANGEBIO), CINVESTAV, Irapuato, 36821, Mexico

7 <sup>2</sup>Center for Human Identification, University of North Texas Health Science Center, Texas, 76107, U.S.A.

8 <sup>3</sup>Department of Mathematics, University of Arizona, Tucson, Arizona, 85721, U.S.A.

9 <sup>4</sup>ARL Division of Biotechnology, University of Arizona, Tucson, Arizona, 85721, U.S.A.

10 \* email: mfh@email.arizona.edu, consuelo.quinto@cinvestav.mx

#### 11 Selection of neutral genomic regions

12 To infer the ascertainment of the Axiom and Affy 6.0 arrays, we first determined a set of neutral genomic regions using the  
13 Neutral Regions Explorer<sup>1</sup> as to reduce the potential interference of natural selection in demographic inference. Several criteria  
14 were applied such as the exclusion of genes, segmental duplications and other repeats, copy number variants, and an interval of  
15 0.1 cM between non-overlapping regions. We restricted the length of this preliminary set of regions to 10 kb. These given  
16 regions were extracted from the CGI genomes, and any site that was not genotyped correctly in at least one of the sampled  
17 individuals was removed from subsequent analyses. Additionally, we extracted sites from the CGI genomes with the same  
18 physical positions as the SNPs present in the Axiom array. The final working set of regions comprised 1386 neutral genomic  
19 regions, referred herein as '10kb loci'. We calculated the number of segregating sites in each of the 10kb loci as well as the  
20 number of SNPs that are present in the Axiom array that are segregating in the YRI, CEU and CHB samples (Supplementary  
21 Fig. S1).

#### 22 Coalescent simulations and summary statistics

23 For all the simulations performed in this work, we used a customized version of the simulator MaCS (Markovian Coalescent  
24 Simulator)<sup>2</sup> for Python which allows faster processing of the coalescent simulations. We used a mutation rate of 2.5e-8  
25 mutations per site<sup>3</sup>, a per nucleotide recombination rate of 1e-8, and the HapMap genetic map<sup>4</sup>.

26 We set up the simulations in the following way: random values for the ascertainment and demographic parameters' prior  
27 distributions were chosen and used to simulate the whole set of 1386 10kb loci. The number of samples simulated corresponded  
28 to the number of real samples from the studied populations (Model 1: YRI, CEU, CHB; Model 2: YRI, CEU, CHB, NXP,  
29 IBS, MXL; See Supplementary Table S1) plus the number of haploid samples in the discovery panel (drawn from the prior  
30 distribution). One simulation includes: the simulation of the whole genome data (10kb loci) in the sample that includes 9  
31 YRI, 9 CEU and 4 CHB diploid individuals, the simulation of the ascertainment sample (referred as discovery panel in the  
32 manuscript) and the ascertained data (ascertained SNPs in each of the 10kb loci in the discovery panel).

33 For each locus in the 10kb loci, we recreated the number and the physical distribution of the SNPs found in the real array,  
34 and computed summary statistics in those SNPs. We also calculated the same summary statistics in the whole-genome data (all  
35 SNPs in the 10kb region). For one simulation, we calculated the mean and standard deviations of all the summary statistics  
36 (from whole-genome and ascertained data) across the 1386 10kb loci (Out-of-Africa model: 108 summary statistics; Mexican  
37 admixture model: 96 summary statistics). These values were later transformed into PLS components.

38 The summary statistics used in this work were: the number of segregating sites, singletons, doubletons, Tajima's D,  
39 number of distinct haplotypes and number of the most frequent haplotype per population,  $F_{ST}$  and number of shared and  
40 private haplotypes between pairs of populations. These statistics were later transformed into Partial Least Squares (PLS)  
41 components using the 'transform' option of ABCtoolbox<sup>5</sup>. We calculated the weight of each of the summary statistics when  
42 the PLS components were computed. The contribution of the top 6 summary statistics for each of the models are shown in  
43 Supplementary Table S2. The full list of the contributions as well as the weights of each of the PLS components can be found  
44 in the supplementary data files S1-S4.

45 PLS produce orthogonal and independent combinations from the simulated summary statistics (predictor variables) and  
46 they eliminate any obvious correlations between the statistics. An important characteristic of PLS components is that each of  
47 them explains the variability of the demographic parameters (the response variables) by maximizing the covariance matrix of  
48 the predictor and response variables<sup>6,7</sup>.

#### 49 Estimation optimization and inference

50 Before any inference was done, we verified that the explored parameter priors in the one million simulations of the Out-of-Africa  
51 model did generate summary statistics similar to the observed in the YRI, CEU and CHB samples (Supplementary Fig. S2).

52 We inferred the ascertainment and demographic parameters of this model with the software ABCtoolbox<sup>5</sup>; which applies a  
53 General Linear Model regression adjustment to estimate the marginal posterior densities of parameters<sup>8</sup>.

54 It is usual practice in ABC to generate a large number of simulations to make sure that the parameter space set by the prior  
55 distributions is being covered (almost) entirely. However, only a subset of the total simulations are used in the actual inference  
56 (between 0.1% and 1%) and the retained simulations are determined by the Euclidean distance between the observed and  
57 simulated summaries. Another important variable that needs to be taken into account is the number of summary statistics (in  
58 our case, PLS components) that are used in an ABC framework. The inclusion of too few PLS components might not provide  
59 enough information, while too many components may overfit the model. The number of simulations that are included in the  
60 analysis can have the same effect.

61 For this reason, and in order to optimize the estimation of the parameters values, we used ABCtoolbox with different  
62 combinations of the number of PLS components and of the number of retained simulations. We used 100, 500, 1000, 2000 and  
63 5000 retained simulations and a range of 2-15, 20, 30 and 50 PLS components. For each combination of these two variables,  
64 we re-sampled the one million simulations with replacement to obtain a joint distribution of the parameter estimates. We later  
65 computed the variance-covariance matrix of the posterior estimates of the parameters (to maintain the structure of the joint  
66 estimation of the parameters), and generated 1000 random samples from a multivariate normal distribution. We then performed  
67 simulations with those values, standardized the observed and simulated summary statistics and calculated the Euclidean distance  
68 between these values. Lastly, we selected the combination of PLS components and number of retained simulations with the  
69 smallest Euclidean distance, confirmed that its parameter values generated summary statistics similar to the observed ones  
70 (with a principal component analysis), and obtained the posterior mode and 95% High Posterior Density Intervals (HPDI) for  
71 each parameter.

## 72 Mexican admixture analysis

73 We merged the Affy 6.0 genotypes from all six populations with PLINK<sup>9</sup> and sites with missing data were removed as well as  
74 first-degree relatives. The final merged dataset contained 594,236 SNPs in 310 individuals.

75 We performed a principal components analysis with EIGENSTRAT<sup>10</sup> and used the ADMIXTURE software<sup>11</sup> with only  
76 the IBS, MXL and NXP samples to determine ancestry proportions. MXL individuals with more than 99% European or 99%  
77 Indigenous ancestry were excluded from the merged set, as they were not considered to be representatives of the admixture  
78 process (Supplementary Fig. S3). For these two analyses, SNPs in linkage disequilibrium were pruned with PLINK<sup>9</sup> (-indep-  
79 pairwise 50 5 0.8). In addition, NXP samples that showed more than 99% European ancestry were also filtered out in order  
80 to limit the amount of non-Native American contribution in this source population. Since only eleven NXP individuals were  
81 retained, the IBS and MXL populations were subsampled to avoid sample size bias and to decrease the computation time of the  
82 coalescent simulations. After we reduced the number of samples, we verified with ADMIXTURE that the admixed individuals  
83 did not have extreme values of European or indigenous ancestry (mean European ancestry=45.9%, Supplementary Fig. S4).

84 As with the simulations of the Out-of-Africa model, we performed a principal components analysis on the observed and  
85 simulated data from this demographic model and corroborated that the explored parameter spaces generated summary statistics  
86 similar to the observed ones (Supplementary Fig. S5).

## 87 Validation of the pipeline

88 To verify the proposed inference pipeline, we performed two sets of analyses. Firstly, for the Out-of-Africa model, we estimated  
89 demographic parameters using exclusively the information from the 10kb loci and compared the obtained values to the estimates  
90 we obtained with the pipeline that accounts for ascertainment bias. The resulting posterior estimates are similar to the ones  
91 obtained applying our pipeline (Supplementary Table S3, Supplementary Fig. S6).

92 Secondly, we took 1000 random pseudo-observed datasets (one from each of the two models considered in this study) in  
93 order to examine the power of the pipeline to correctly recover the true parameter values. Our estimations were always within  
94 the 95% HPDI and the true values were most of the time recovered by the mode of the posterior distributions. Supplementary  
95 Figures S7 and S8 show the results of one pseudo-observed dataset from the Out-of-Africa model, and one pseudo-observed  
96 dataset from the Mexican admixture model.

97 In addition, for each of the 1000 pseudo-observed datasets, we calculated the ratio of the estimated parameters and their  
98 true value. If these two values are similar, then the ratio should be close to one. For this analysis, we used the combination of  
99 PLS components and retained simulations that provided the best estimates for the observed data in each case. For both tested  
100 models, for almost all the parameters, the mode of distributions of the ratio is close to the expected value of one (Supplementary  
101 Figures S9 and S10). However, in the case of the Log(NAT), Log(NIBS) and Log(NMEX) of the Mexican admixture model,  
102 the estimated values were lower than their true values and the ratios are closer to 0.5; indicating that the estimated values were  
103 roughly half of the true value. This observation is consistent with the estimates we obtained for the same parameters when we  
104 used the real data.

## 105 Comparison with previous published methods

106 In 2010, Wollstein and colleagues investigated the demographic history of Oceania with SNP microarray data (Affy 6.0)  
107 and described a two-step approach to account for ascertainment bias using ABC<sup>12</sup>. Our pipeline substantially differs from  
108 Wollstein's method in the following aspects: a) we find SNPs based on a discovery panel and a frequency cut-off vs. finding  
109 all variable sites; b) we use a large number of summary statistics (that are later linearly transformed) vs. a small number of  
110 statistics and no linear transformation; c) we search for the optimal number of retained simulations and summary statistics for  
111 parameter inferences vs. just retaining a small percentage of simulations for inference; d) we utilize a bootstrap strategy vs.  
112 no bootstrap; and e) we perform the inference of ascertainment and demographic parameters at the same time vs. a two-step  
113 process.

114 We implemented Wollstein's method following the description provided in the supplementary materials of the paper as close  
115 as possible so some of the observed disparities could be justified by our execution of his approach and the obvious changes on  
116 the data and models utilized.

117 We followed Wollstein's steps to infer the ascertainment and demographic parameters of the Out-of-Africa and Mexican  
118 admixture models using our observed data and pseudo-observed datasets. We reduced our summary statistics in order to  
119 replicate the set used in<sup>12</sup>: mean number of segregating sites, mean  $F_{ST}$ , mean number of different haplotypes, mean number of  
120 the most frequent haplotype in both the 10kb loci and array data. We also retained the same percentage of simulations as in the  
121 aforementioned paper (~0.02% of the total number of simulations). We then compared the mode and the width of the 95%  
122 HPDI of the parameters' estimations obtained by the two methods and verified if the true values of pseudo-observed datasets  
123 were recovered by Wollstein's method.

124 We also verified if the truncated prior distribution was informative to compute the posterior distribution. This distribution is  
125 built based on the parameter values of the retained simulations that are kept for analysis, thus making these values a subset of  
126 the prior distribution and directly affecting the amount of information given for inference. We observed some issues in the  
127 performance of Wollstein's method to estimate appropriately some of the parameters, using real and simulated data. As seen in  
128 Supplementary Figures S11 and S12, the truncated prior distributions were not informative (looking alike the prior distribution)  
129 in some cases or the mode did not coincide with the posterior mode.

130 We used nine pseudo-observed datasets of the Mexican admixture model to examine the general performance of Wollstein's  
131 method (Supplementary Table S7). In each cell of this table, it is indicated whether or not the true value of the parameters was  
132 recovered by the 95% HPDI calculated by the two methodologies. There was not a obvious trend about what parameters could  
133 not be estimated properly. Wollstein's method failed 46% of the time (29/63) to recover the true values, while our method failed  
134 8% (5/63) of the time. Supplementary Table S8 shows the results of only one of these sets. For almost half of the parameters,  
135 our 95% intervals were smaller than Wollstein's and they overlapped, with the exception of the time of split between CEU and  
136 IBS (Supplementary Figures S13 and S14).

137 Since we implemented the analyses with the same proportion of simulations that Wollstein seemed to have retained (0.02%  
138 of the total), the observed differences could be explained by the small amount of information that was given to ABCtoolbox  
139 for the inference. Additionally, both this work and<sup>12</sup> used genotype data derived from the Affy 6.0 array and inferred the  
140 ascertainment scheme for the SNPs present in this array. The estimates are strikingly different: 19 haploid samples from YRI  
141 vs. 2, 8 vs. 1 from CEU, and 11 vs. 2 from CHB (see Supplementary Figure S13).

## 142 Scripts

143 The list of the 10kb loci and all the scripts used in this work can be found in the following link:

144 <https://bitbucket.org/cdquinto/ascertainment-bias-scripts/>

## 145 Supplementary data files

146 Dataset S1: Contribution of the summary statistics to the PLS transformation of the Out-of-Africa model analysis.

147 Dataset S2: Contribution of the summary statistics to the PLS transformation of the Mexican admixture model analysis.

148 Dataset S3: Value of each of the PLS components of the Out-of-Africa model analysis.

149 Dataset S4: Value of each of the PLS components of the Mexican admixture model.

150 The abbreviations used in those files correspond to :

152 Populations: Af - Africa; Eu - Europe; As - Asia; Mex - Mexicans; Ibe - Iberians; Nat - Nahuas.

153 Genetic summaries: SegS - segregating sites; Sing - singletons; Dupl - doubletons; TajD - Tajima's D; FST - Wright's fixation  
154 index; Pi - nucleotide diversity; hap - haplotypes.

155 Standard summaries: Nb - number; m - mean; sd - standard deviation; CGI - genomic summaries; ASC - summaries from  
156 ascertained SNPs.

**Supplementary Table S1. Summary of the data included in this study**

| <b>Population</b> | <b>PopID</b> | <b>Initial n</b> | <b>Final n</b> | <b>Region</b>               | <b>Data</b>                                                                     | <b>Reference</b>                         |
|-------------------|--------------|------------------|----------------|-----------------------------|---------------------------------------------------------------------------------|------------------------------------------|
| Yoruba            | YRI          | 9                | 9              | West Africa                 | Complete Genomics<br>Affymetrix Axiom Genome-Wide Human Array<br>Affymetrix 6.0 | <a href="#">13</a><br><a href="#">14</a> |
| European American | CEU          | 9                | 9              | Northern and Western Europe | Complete Genomics<br>Affymetrix Axiom Genome-Wide Human Array<br>Affymetrix 6.0 | <a href="#">13</a><br><a href="#">14</a> |
| Han Chinese       | CHB          | 4                | 4              | Beijing, China              | Complete Genomics<br>Affymetrix Axiom Genome-Wide Human Array<br>Affymetrix 6.0 | <a href="#">13</a><br><a href="#">14</a> |
| Spanish           | IBS          | 162              | 11             | Southern Europe             | Affymetrix 6.0                                                                  | <a href="#">15</a>                       |
| Mexican American  | MXL          | 104              | 11             | California, USA             | Affymetrix 6.0                                                                  | <a href="#">15</a>                       |
| Nahua             | NXP          | 22               | 11             | Puebla, Central-East Mexico | Affymetrix 6.0                                                                  | <a href="#">15</a>                       |

**Supplementary Table S2.** Contributions of summary statistics

| <b>Out of Africa model</b>                  | <b>Weight</b> | <b>Mexican admixture model</b>                 | <b>Weight</b> |
|---------------------------------------------|---------------|------------------------------------------------|---------------|
| Nb different haplotypes in Africa (ASC,sd)  | 2.80145043    | Nb doubletons in Asia (CGI,m)                  | 2.02944394    |
| Tajima's D in Europe (CGI,m)                | 2.45108901    | Nb shared haplotypes Iberian-Mexicans (ASC,sd) | 2.02208214    |
| Nb shared haplotypes Africa-Europe (ASC,sd) | 2.40768415    | Nb different haplotypes Mexicans (ASC,sd)      | 1.81347634    |
| Nb segregating sites Europe (ASC,sd)        | 2.08818833    | Tajima's D in Iberians (ASC,sd)                | 1.7469355     |
| Nb shared haplotypes Europe-Asia (ASC,sd)   | 2.07461472    | Mode haplotypes Mexicans (ASC,sd)              | 1.45501021    |
| Nb segregating sites Africa (CGI,m)         | 1.64600266    | Pi Nahuas (ASC,sd)                             | 1.44987776    |

159 Abbreviations: Nb - number; CGI - genomic summaries; ASC - summaries from ascertained SNPs; m - mean; sd - standard deviation

**Supplementary Table S3. Comparison of estimates of the Out-of-Africa demographic parameters**

| <b>Parameter</b>   | <b>Mode 10kb loci<br/>(95% HDPI)</b> | <b>Mode 10kb loci and pseudo-array<br/>(95% HPDI)</b> |
|--------------------|--------------------------------------|-------------------------------------------------------|
| <b>log10(NYRI)</b> | 4.65 (4.05-4.99)                     | 4.63 (4.36-4.90)                                      |
| <b>log10(NCEU)</b> | 4.13 (3.78-4.46)                     | 4.62 (4.28-4.95)                                      |
| <b>log10(NCHB)</b> | 3.53 (3.27-3.73)                     | 3.67 (3.52-3.79)                                      |
| <b>NEU_AS</b>      | 2772.73 (1588.38-4865.49)            | 4469.7 (2216.22-5000)                                 |
| <b>TEU_AS</b>      | 1005.48 (426-1436.49)                | 1401.16 (1160.94-1599)                                |
| <b>TAF</b>         | 2307.07 (1612.63-3278.14)            | 2786.87 (2117.68-3277.96)                             |

160 The first column contains the estimates of parameters using only summary statistics from the 10kb loci (free of ascertainment). The second column has the  
161 estimates obtained with our proposed inference pipeline. Parameter labels correspond to those given in Figure 1. Divergence times are given in generations  
162 units. For posterior distributions, see Figure S6.

**Supplementary Table S4. Comparison of inferred posterior estimates of the parameters of the Out-of-Africa from observed data**

| <b>Parameter</b>             | <b>Estimated mode<br/>Our pipeline</b> | <b>95% HPDI<br/>Our pipeline</b> | <b>Width</b> | <b>Estimated mode<br/>Wollstein</b> | <b>95% HPDI<br/>Wollstein</b> | <b>Width</b> |
|------------------------------|----------------------------------------|----------------------------------|--------------|-------------------------------------|-------------------------------|--------------|
| <b>nYRI</b>                  | 3.82                                   | 2-9.59                           | 7.59         | 6.55                                | 3-13.2                        | 10.2         |
| <b>nCEU</b>                  | 17.82                                  | 4.58-20                          | 15.42        | 9.82                                | 7.06-19.9                     | 12.84        |
| <b>nCHB</b>                  | 17.09                                  | 6.5-20                           | 13.5         | 6.55                                | 2.72-13.18                    | 10.46        |
| <b>Frequency<br/>cut-off</b> | 0.094                                  | 0.07-0.1                         | 0.03         | 0.1                                 | 0.091-0.1                     | 0.009        |
| <b>log10(NYRI)</b>           | 4.63                                   | 4.36-4.9                         | 0.54         | 4.88                                | 4.7-5                         | 0.3          |
| <b>log10(NCEU)</b>           | 4.61                                   | 4.28-4.95                        | 0.67         | 5                                   | 4.8-5                         | 0.2          |
| <b>log10(NCHB)</b>           | 3.67                                   | 3.52-3.79                        | 0.27         | 4.11                                | 3.96-4.25                     | 0.29         |
| <b>NEU_AS</b>                | 4469.7                                 | 2216.22-5000                     | 2783.78      | 1500                                | 1500-2244.15                  | 744.15       |
| <b>TEU_AS</b>                | 1401.16                                | 1160.94-1599                     | 438.06       | 878.3                               | 687.53-1205.93                | 518.4        |
| <b>TAF</b>                   | 2786.87                                | 2117.68-3277.96                  | 1160.28      | 1877.78                             | 1600-2224.7                   | 624.7        |

163 See posterior distributions in Figure S11.

**Supplementary Table S5. Comparison of inferred posterior estimates of the parameters of the Out-of-Africa model from simulated data**

| Parameter                | True value | Estimated mode<br>Our pipeline | 95% HPDI<br>Our pipeline | Width   | Estimated mode<br>Wollstein | 95% HPDI<br>Wollstein | Width   |
|--------------------------|------------|--------------------------------|--------------------------|---------|-----------------------------|-----------------------|---------|
| <b>nYRI</b>              | 12         | 10.91                          | 4.69-16.7                | 12.01   | 5.82                        | 3.32-16.2             | 12.88   |
| <b>nCEU</b>              | 9          | 17.27                          | 3.94-19.53               | 15.59   | 8                           | 3.35-19.29            | 15.94   |
| <b>nCHB</b>              | 20         | 14.73                          | 5.11-19.58               | 14.47   | 8                           | 2.72-19.51            | 16.79   |
| <b>Frequency cut-off</b> | 0.053      | 0.062                          | 0.051-0.08               | 0.029   | 0.059                       | 0.051-0.087           | 0.036   |
| <b>log10(NYRI)</b>       | 4.12       | 4.34                           | 3.9-4.89                 | 0.99    | 4.25                        | 3.98-4.78             | 0.8     |
| <b>log10(NCEU)</b>       | 4.64       | 4.72                           | 4.45-4.94                | 0.49    | 4.74                        | 4.37-4.97             | 0.6     |
| <b>log10(NCHB)</b>       | 4.20       | 4.21                           | 3.92-4.54                | 0.62    | 4.15                        | 3.92-4.4              | 0.48    |
| <b>NEU_AS</b>            | 4477.0     | 4575.76                        | 3656.34-4958.15          | 1301.81 | 4611.11                     | 3685.15-4966.27       | 1281.12 |
| <b>TEU_AS</b>            | 1311.0     | 1288.11                        | 1123.82-1468.95          | 345.13  | 1330.51                     | 924.12-1568.38        | 644.26  |
| <b>TAF</b>               | 3624.0     | 3569.7                         | 3340.48-3789.81          | 449.33  | 3594.95                     | 3096.96-4024.94       | 927.98  |

164 Posterior mode and 95% HPDI of one pseudo-observed data set. We compared the true parameter values to the estimated mode and the width of the  
165 corresponding confidence intervals. See posterior distributions in Figure S12.



**Supplementary Table S6. Comparison of inferred posterior estimates of the parameters of the Mexican admixture model from observed data**

| <b>Parameter</b>   | <b>Estimated mode<br/>Our pipeline</b> | <b>95% HPDI<br/>Our pipeline</b> | <b>Width</b> | <b>Estimated mode<br/>Wollstein</b> | <b>95% HPDI<br/>Wollstein</b> | <b>Width</b> |
|--------------------|----------------------------------------|----------------------------------|--------------|-------------------------------------|-------------------------------|--------------|
| <b>log10(NNXP)</b> | 4.13                                   | 3.38-4.91                        | 1.53         | 3.75                                | 3.42-4                        | 0.58         |
| <b>log10(NIBS)</b> | 4.71                                   | 3.4-4.99                         | 1.59         | 5                                   | 4.65-5                        | 0.35         |
| <b>log10(NMXL)</b> | 4.21                                   | 3.3-4.99                         | 1.69         | 4.13                                | 3.62-4.93                     | 1.31         |
| <b>TCEU_IBS</b>    | 976                                    | 400-1297                         | 897          | 1592                                | 1434.94-1592                  | 157.06       |
| <b>TCHB_NXP</b>    | 689                                    | 418-1492                         | 1074         | 1007.09                             | 456-1207                      | 751          |
| <b>TADM</b>        | 21.5                                   | 16.53-23.99                      | 7.46         | 21.66                               | 17.98-23.7                    | 5.72         |
| <b>PADM</b>        | 0.52                                   | 0.43-0.69                        | 0.26         | 0.59                                | 0.53-0.66                     | 0.13         |

166

See posterior distributions in Figure [S13](#).

**Supplementary Table S7. Comparison of inferred posterior estimates of the parameters of the Mexican admixture model from simulated data sets**

| Parameter          | In 95% HPDI?<br>Our pipeline |   |   |   |   |   |   |   |   | In 95% HPDI?<br>Wollstein's method |   |   |   |   |   |   |   |   |
|--------------------|------------------------------|---|---|---|---|---|---|---|---|------------------------------------|---|---|---|---|---|---|---|---|
|                    | 1                            | 2 | 3 | 4 | 5 | 6 | 7 | 8 | 9 | 1                                  | 2 | 3 | 4 | 5 | 6 | 7 | 8 | 9 |
| <b>log10(NAT)</b>  | Y                            | Y | Y | Y | Y | Y | Y | Y | N | N                                  | Y | N | N | N | Y | Y | Y | N |
| <b>log10(NIBS)</b> | Y                            | Y | Y | Y | Y | Y | Y | Y | Y | N                                  | N | N | N | N | N | Y | Y | Y |
| <b>log10(NMEX)</b> | Y                            | Y | N | Y | Y | Y | N | N | Y | Y                                  | Y | N | Y | Y | Y | N | Y | Y |
| <b>TCEU_IBS</b>    | Y                            | Y | Y | Y | Y | Y | Y | Y | Y | N                                  | Y | Y | N | Y | N | Y | N | N |
| <b>TCHB_NAT</b>    | Y                            | Y | Y | Y | Y | Y | Y | Y | Y | N                                  | N | Y | N | N | Y | N | N | Y |
| <b>TADM</b>        | Y                            | Y | Y | Y | N | Y | Y | Y | Y | Y                                  | N | Y | N | N | Y | Y | Y | Y |
| <b>PADM</b>        | Y                            | Y | Y | Y | Y | Y | Y | Y | Y | Y                                  | Y | Y | Y | Y | Y | N | N | Y |

<sup>167</sup> In each cell of the table it is indicated whether or not the true values from nine pseudo-observed datasets of the Mexican admixture model were recovered  
<sup>168</sup> in the 95% HPDI calculated by the two methodologies.

**Supplementary Table S8. Comparison of inferred posterior estimates of the parameters of the Mexican admixture model from simulated data**

| <b>Parameter</b>   | <b>True value</b> | <b>Estimated mode<br/>Our pipeline</b> | <b>95% HPDI<br/>our pipeline</b> | <b>Width</b> | <b>Estimated mode<br/>Wollstein</b> | <b>95% HPDI<br/>Wollstein</b> | <b>Width</b> |
|--------------------|-------------------|----------------------------------------|----------------------------------|--------------|-------------------------------------|-------------------------------|--------------|
| <b>log10(NAT)</b>  | 3.53              | 3.65                                   | 3.29-4.54                        | 1.25         | 3.44                                | 3.11-3.83                     | 0.72         |
| <b>log10(NIBS)</b> | 4.50              | 4.70                                   | 4.22-4.99                        | 0.77         | 3.53                                | 3.17-3.89                     | 0.72         |
| <b>log10(NMEX)</b> | 3.74              | 4.52                                   | 3.28-5                           | 1.72         | 4.60                                | 3.14-4.99                     | 1.85         |
| <b>TCEU_IBS</b>    | 634               | 496.72                                 | 400-788.20                       | 388.2        | 400                                 | 400-454.27                    | 54.27        |
| <b>TCHB_NAT</b>    | 661               | 533.11                                 | 400-825.96                       | 425.96       | 445.82                              | 400-701.55                    | 301.55       |
| <b>TADM</b>        | 17                | 16.48                                  | 16-21.83                         | 5.83         | 20.28                               | 16.70-23.64                   | 6.94         |
| <b>PADM</b>        | 0.89              | 0.89                                   | 0.79-0.98                        | 0.19         | 0.79                                | 0.67-0.90                     | 0.23         |

169 Posterior mode and 95% HPDI of one pseudo-observed data set. We compared the true parameter values to the estimated mode and the width of the  
170 corresponding confidence intervals. See posterior distributions in Figure S14.

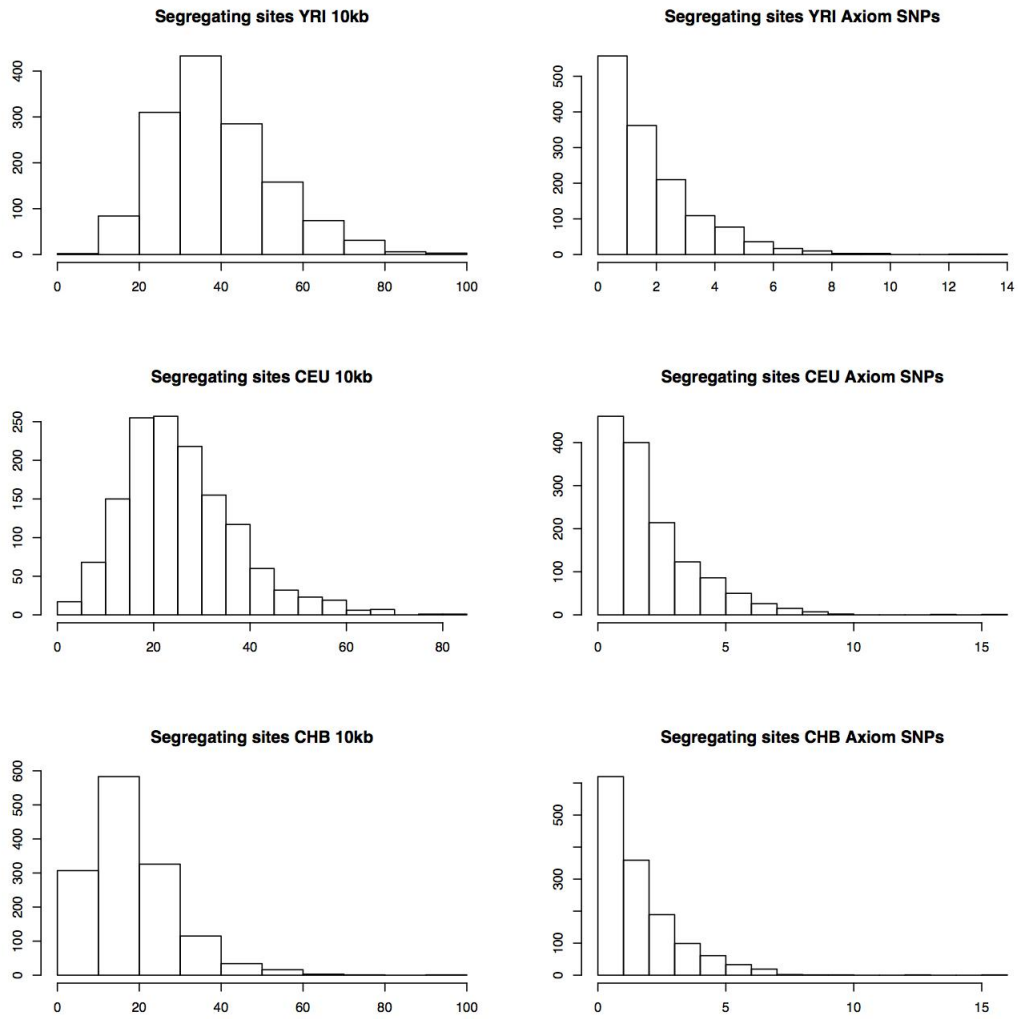

**Supplementary Figure S1. Histograms with the distribution of segregating sites in the 10kb loci and of the Axiom SNPs.** The distribution of segregating sites in the 10kb regions is depicted in the right panel. On the left, the histograms correspond to the number of segregating sites of the Axiom SNPs in the 10kb loci.

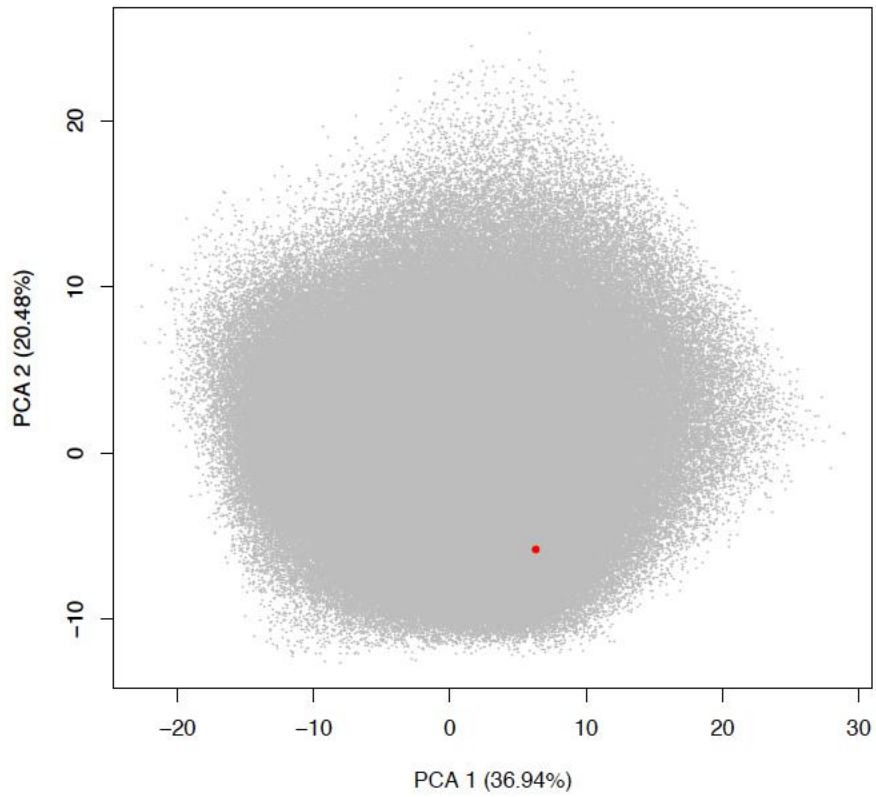

**Supplementary Figure S2. Principal components analysis of the coalescent simulations of the Out-of-Africa model.** The grey cloud represent the simulated summary statistics while the red dot corresponds to the observed summary statistics.

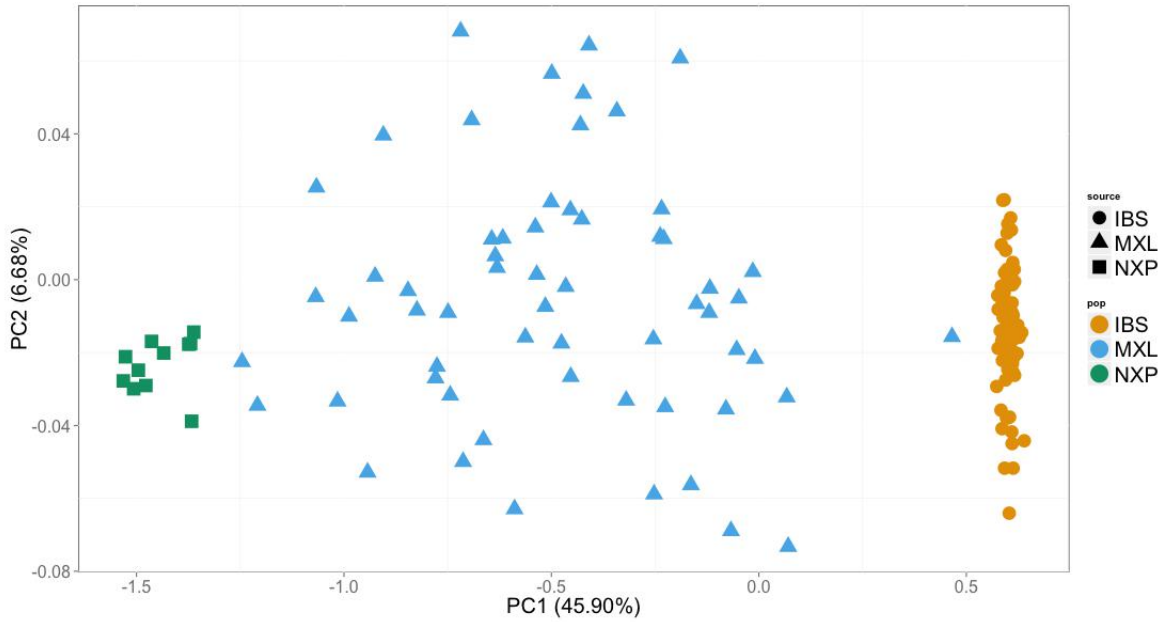

**Supplementary Figure S3. Principal component analysis of the IBS, NXP and MXL individuals using genome-wide SNP data.** PCA with all the unrelated MXL individuals from the 1000 Genomes Project. The orange points represent the individuals with Iberian ancestry (IBS), green points designate the Nahuas from Puebla (NXP); and light blue points correspond to the MXL samples. PCA with IBS, NXP and MXL samples with the two outliers removed. The analysis was done with 594, 236 SNPs in 151 individuals. The percentage of the variance explained by the first two principal components are between parenthesis.

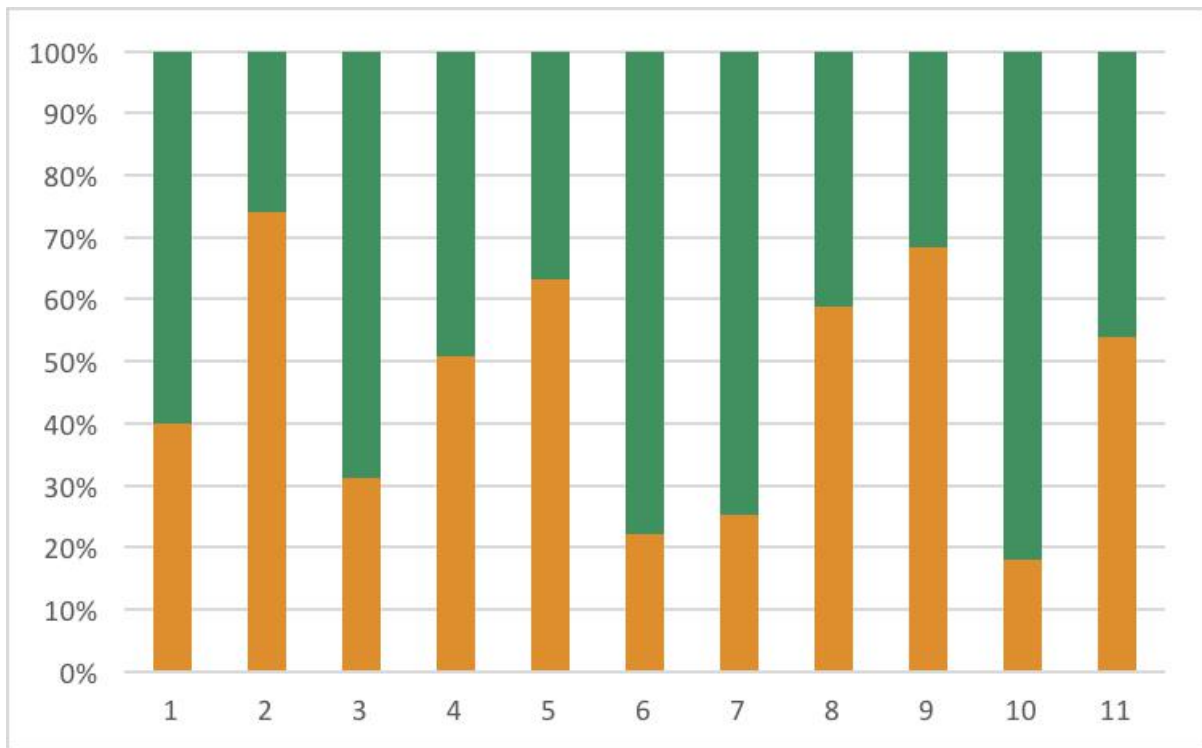

**Supplementary Figure S4. Admixture plot of MXL individuals based on genome-wide SNP data.** Ancestry proportions estimated in 11 Mexican individuals using ADMIXTURE<sup>11</sup> when the number of clusters was set to 2 (594, 236 SNPs). The orange color corresponds to the inferred Spanish ancestry, and the green one depicts the indigenous Native American contribution. These 11 individuals were used in the subsequent analysis. The average Iberian ancestry is 46%, and the indigenous contribution 54%.

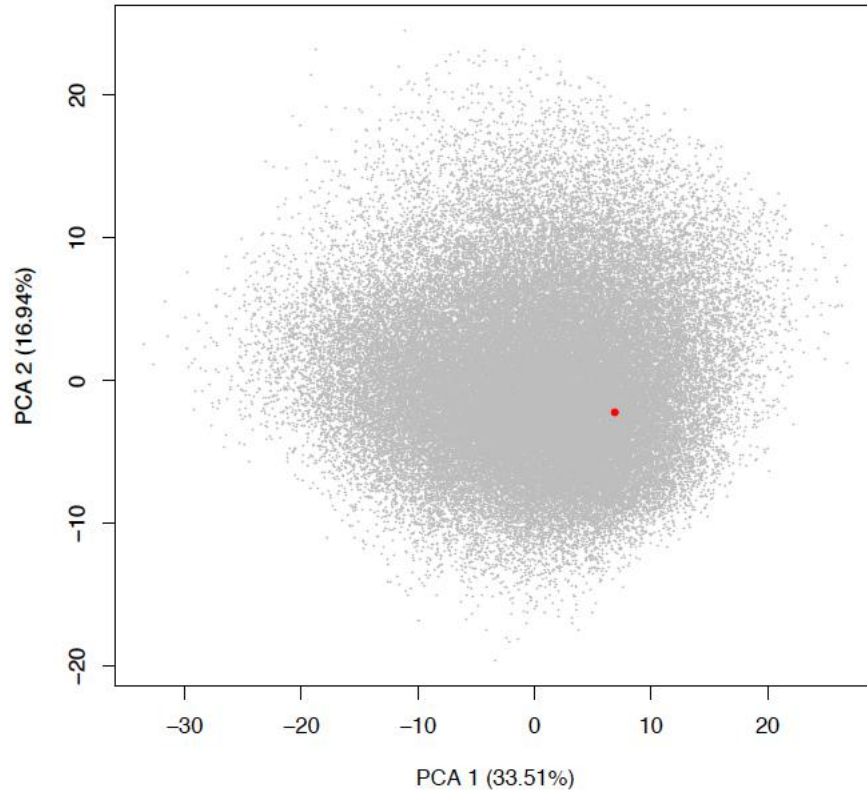

**Supplementary Figure S5. Principal component analysis of the coalescent simulations of the Mexican admixture model.** The grey cloud represent the simulated summary statistics while the red dot corresponds to the observed summary statistics.



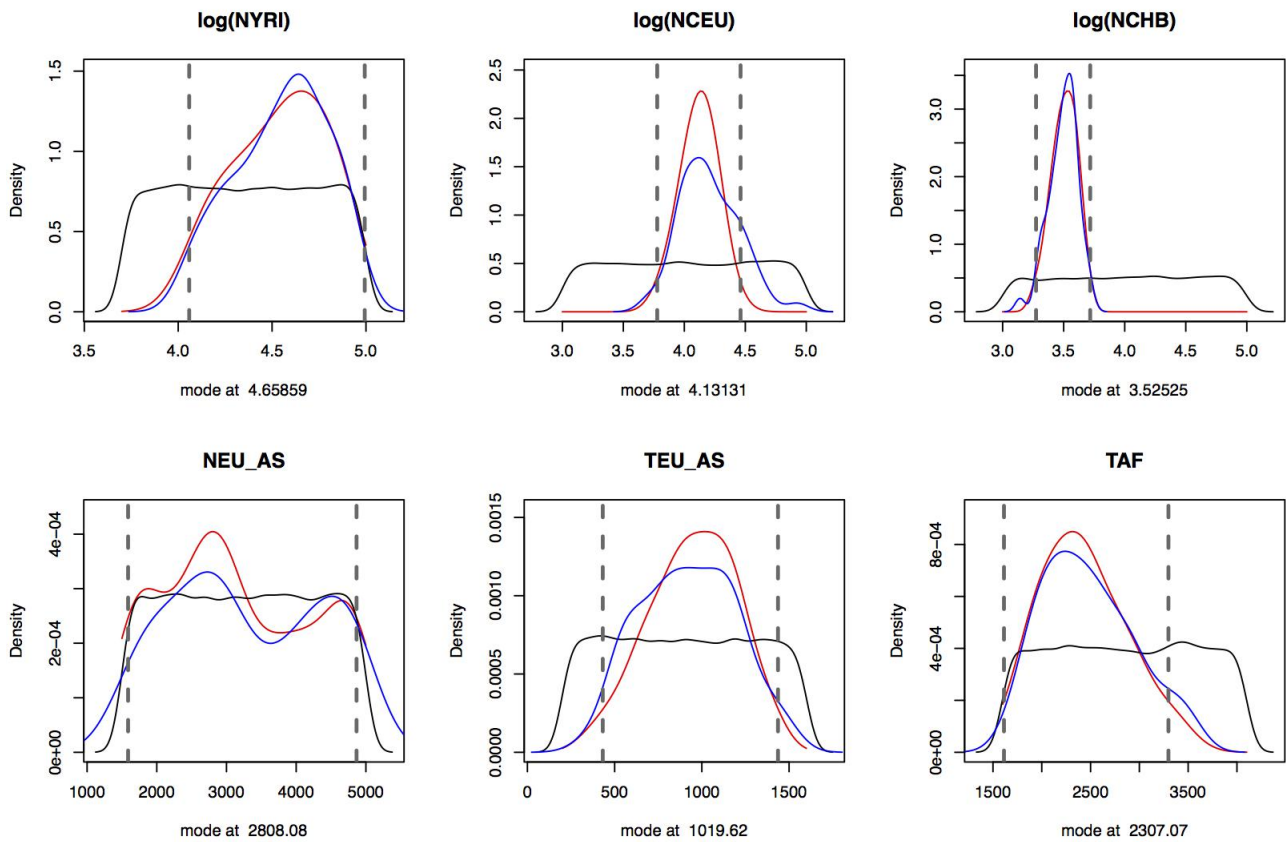

**Supplementary Figure S6. Posterior distributions of the demographic parameters of the Out-of-Africa model based on the 10kb loci summaries only.** The black curve corresponds to the prior distribution of the parameter values, while the blue one is the truncated prior distribution. The truncated prior distribution is the distribution of the parameters kept after the rejection process (part of ABCtoolbox's method). The red curve is the posterior distribution, and the dashed lines are the 95% High Posterior Density Interval.

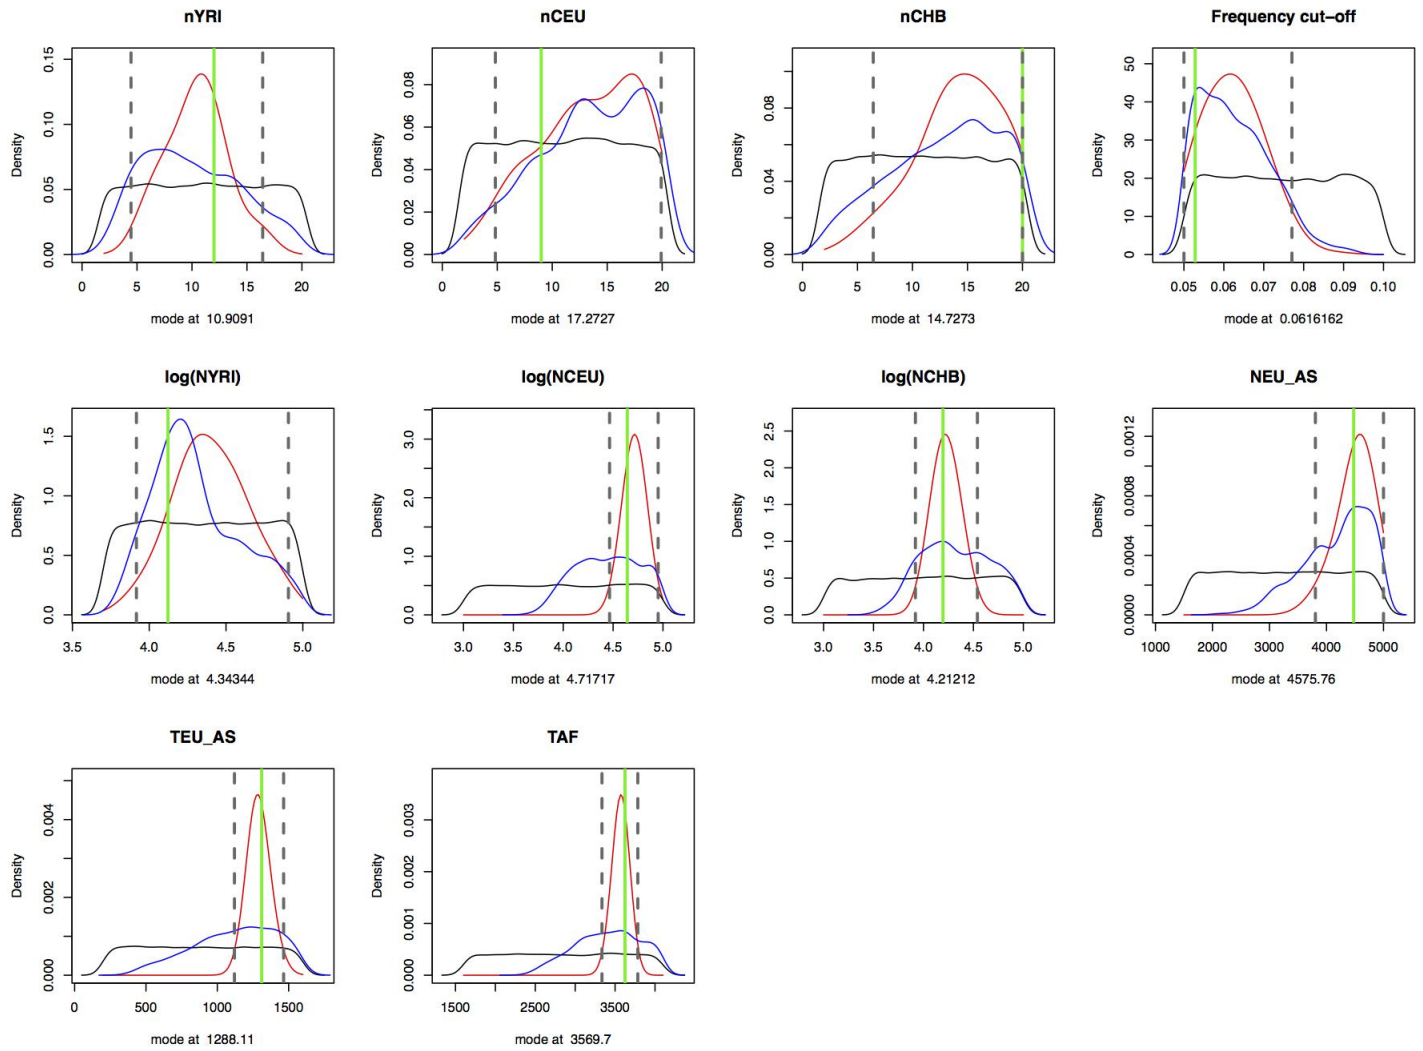

**Supplementary Figure S7. Posterior distributions of the discovery set and demographic parameters as estimated from the Out-of-Africa model using one pseudo-observed data set.** The black curve corresponds to the prior distribution of the parameter values, while the blue one is the truncated prior distribution. This distribution is built based on the parameter values of the retained simulations that are kept for analysis based on euclidean distance of the simulated summary statistics from the observed summary statistics, thus making these values a subset of the prior distribution and directly affecting the amount of information given for inference. The red curve is the posterior distribution, and the dashed lines are the 95% High Posterior Density Interval. The true values of the parameters (in bright green) were recovered by the mode of the posterior distributions (in almost all the cases) and by the 95% High Posterior Density Interval.

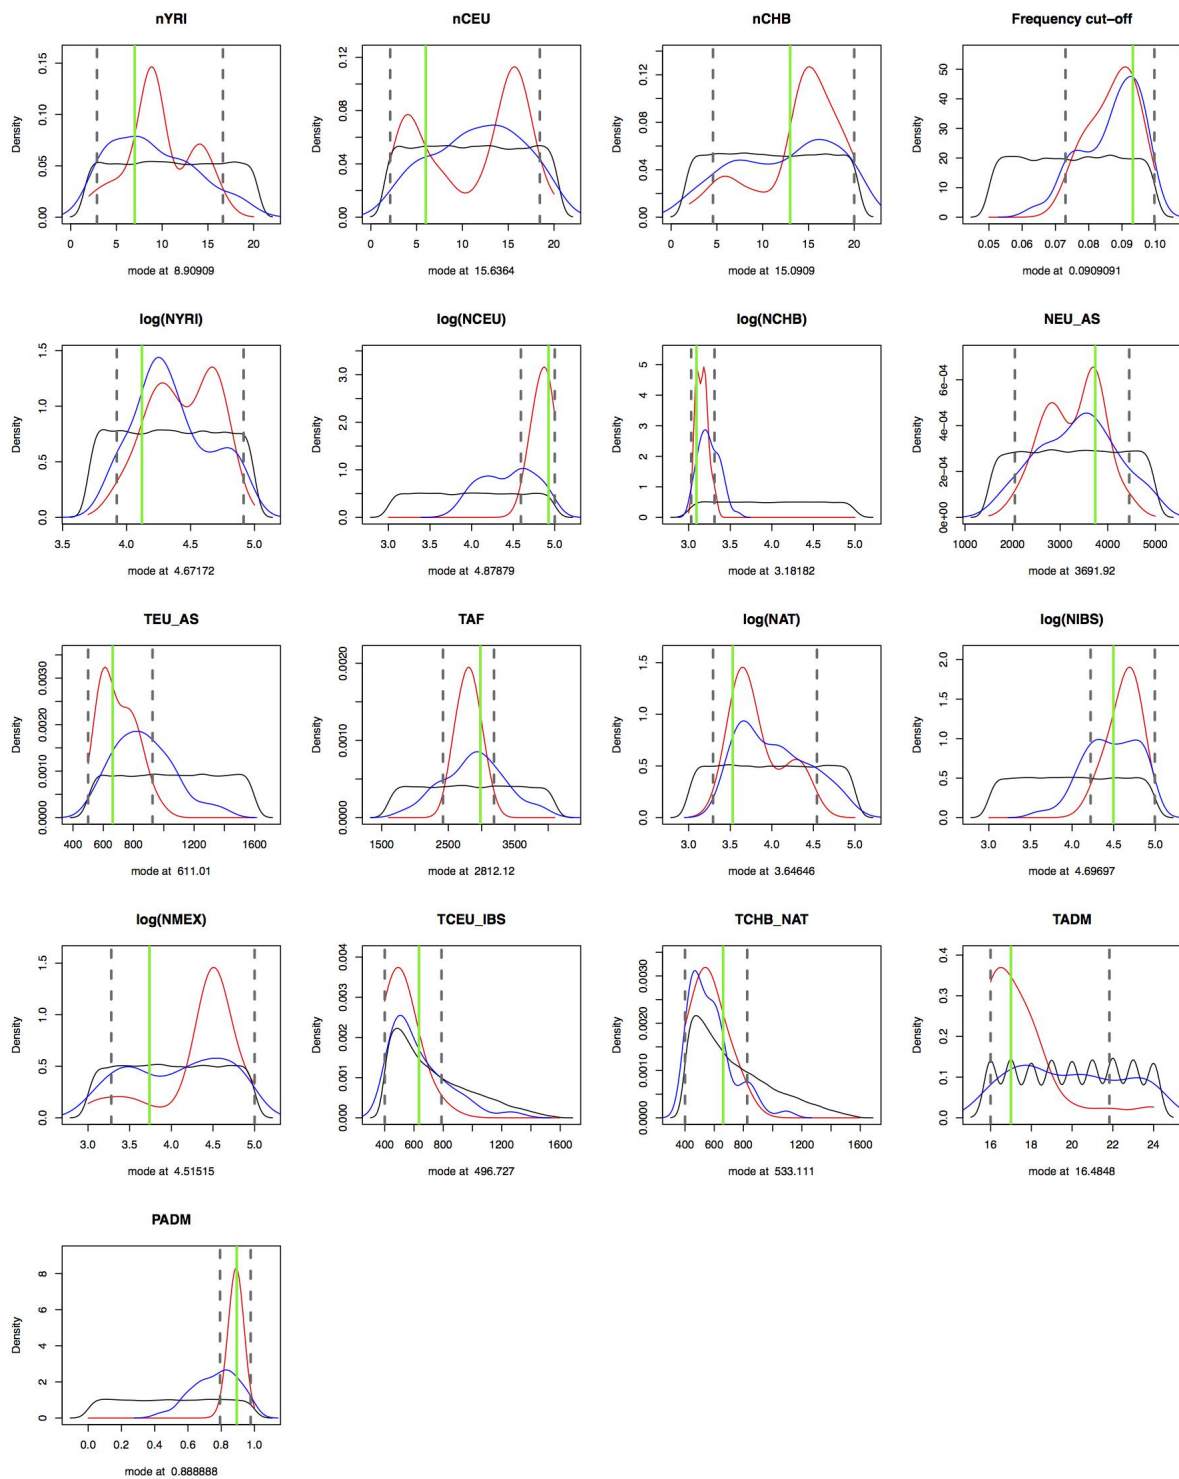

**Supplementary Figure S8. Posterior distributions of the discovery set and demographic parameters of the Mexican admixture model using simulated data. Same color legend as Figure S7.**

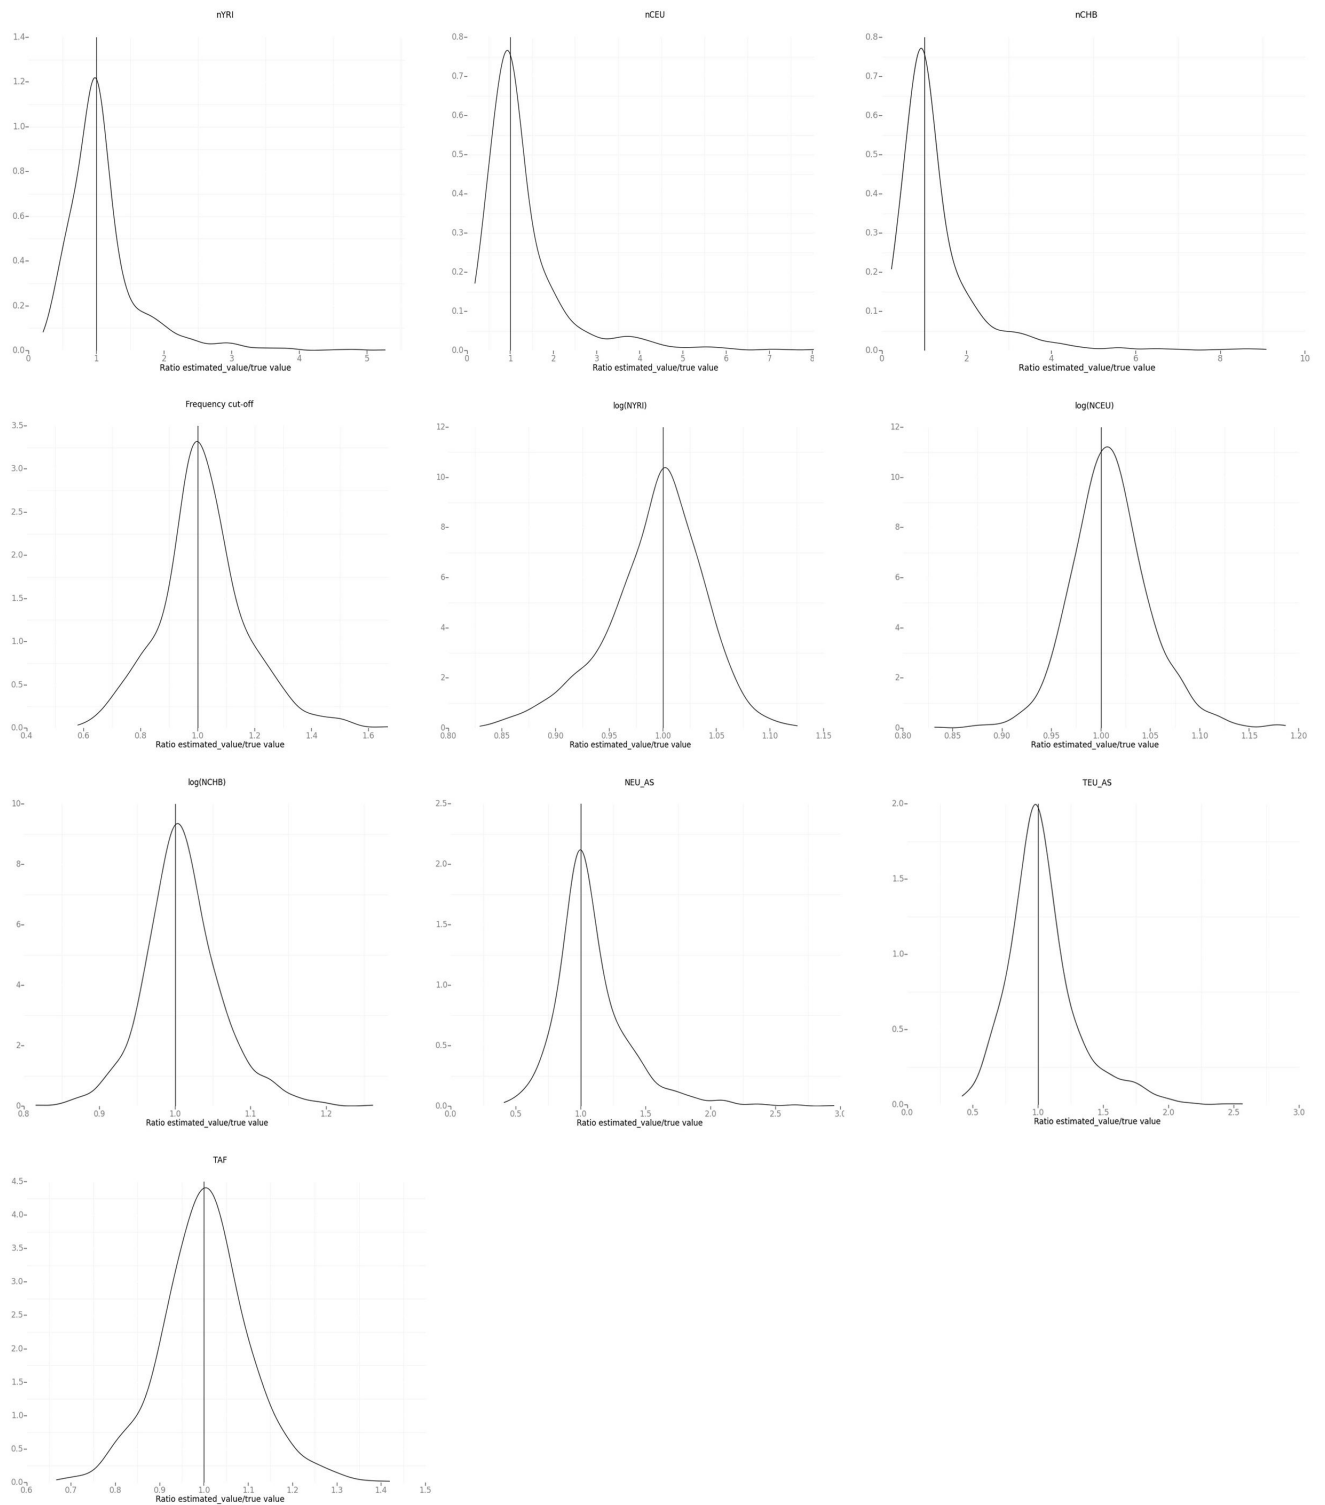

**Supplementary Figure S9. Distribution of the ratio of the estimated and the true value of the parameters of 1,000 pseudo observed datasets from the Out-of-Africa model.**



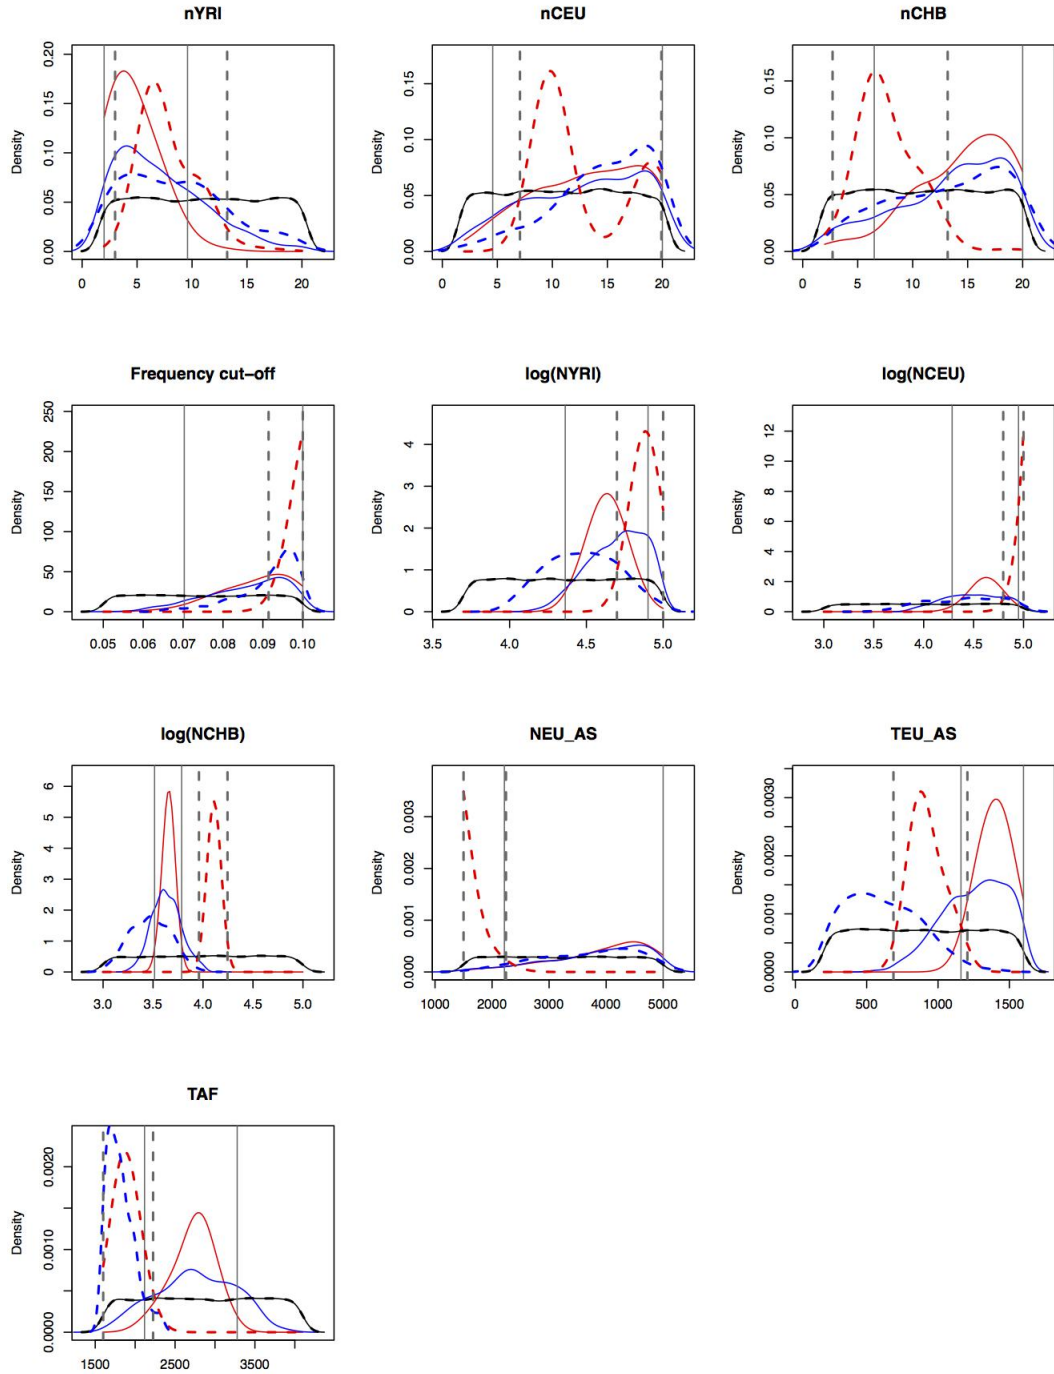

**Supplementary Figure S11. Comparison of the inferred posterior distributions of the parameters of the Out-of-Africa using observed data.** The plots depict the posterior distributions obtained with Wollstein's method (dash lines) and our pipeline (solid lines) when the observed data was used. The posterior distributions are in red, the truncated priors (estimated from the retained simulations) are shown in blue, the prior distributions are drawn in black, and the vertical grey lines correspond to the 95% HPDI.

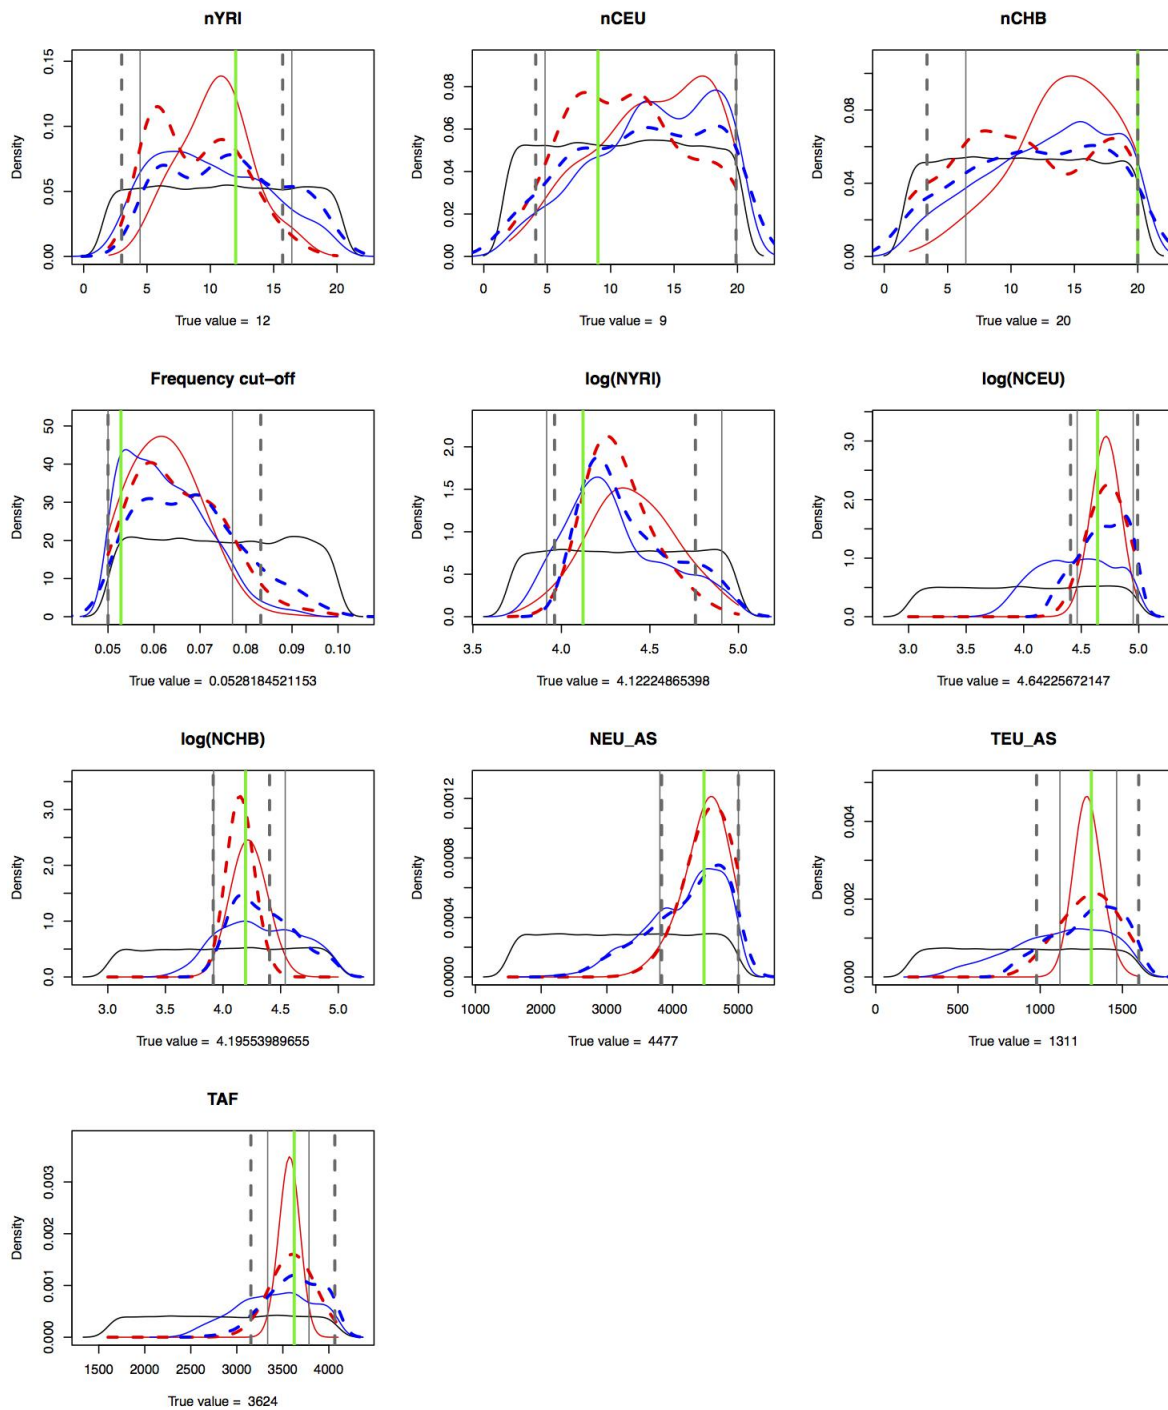

**Supplementary Figure S12. Comparison of the inferred posterior distributions of the parameters of the Out-of-Africa model using simulated data.**



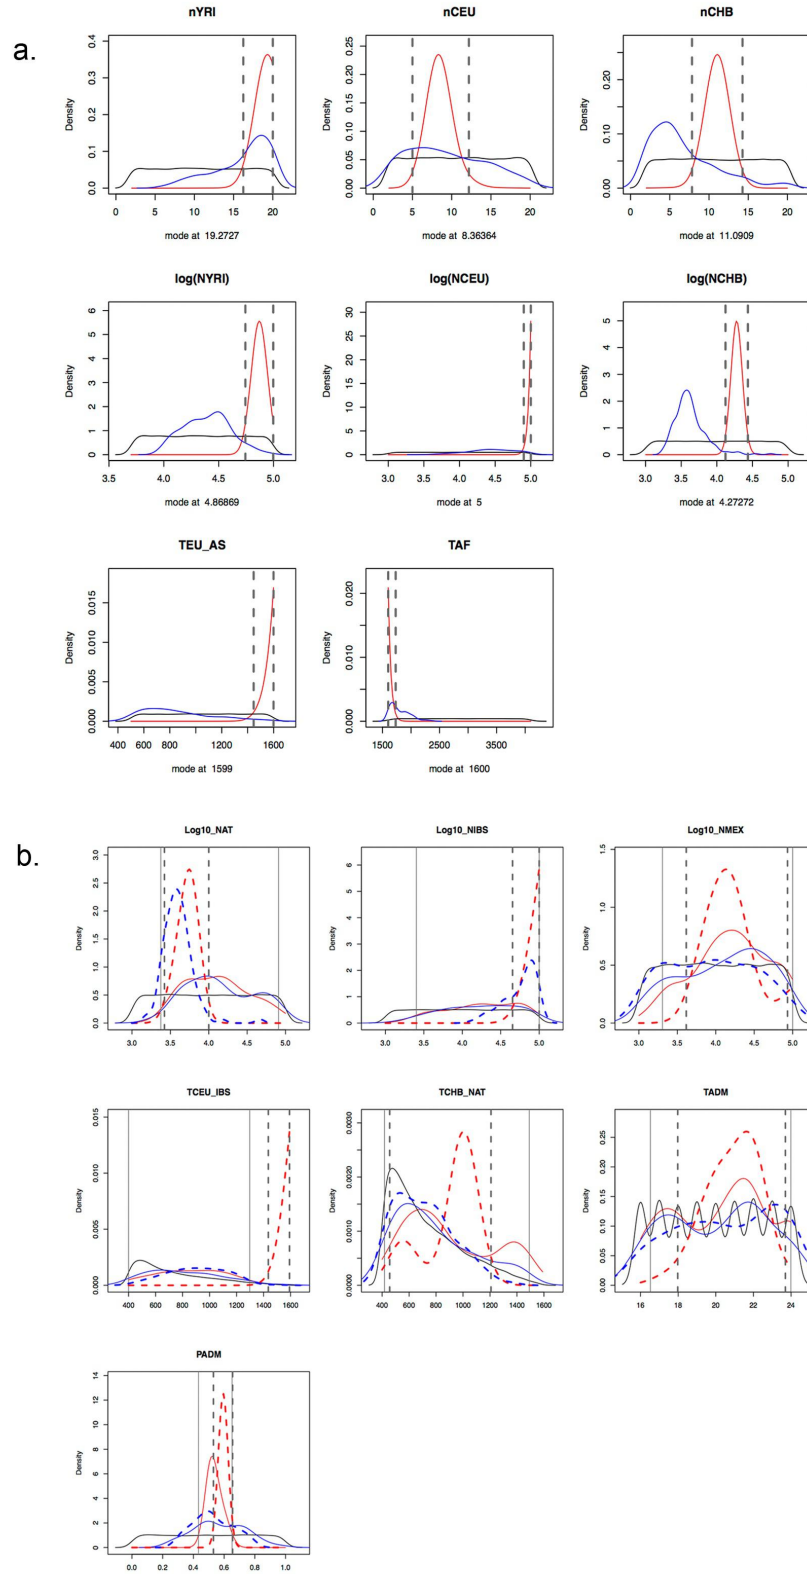

**Supplementary Figure S13. Comparison of the inferred posterior distributions of the parameters of the Mexican admixture model using observed data.**

**a.** Posterior distributions of the HapMap demographic parameters and the ascertainment parameters inferred with Wollstein's method, and used as priors for the Mexican admixture model. **b.** Comparison of the posterior distributions of the Mexican admixture model. Dash lines correspond to Wollstein's method and solid lines to our pipeline.



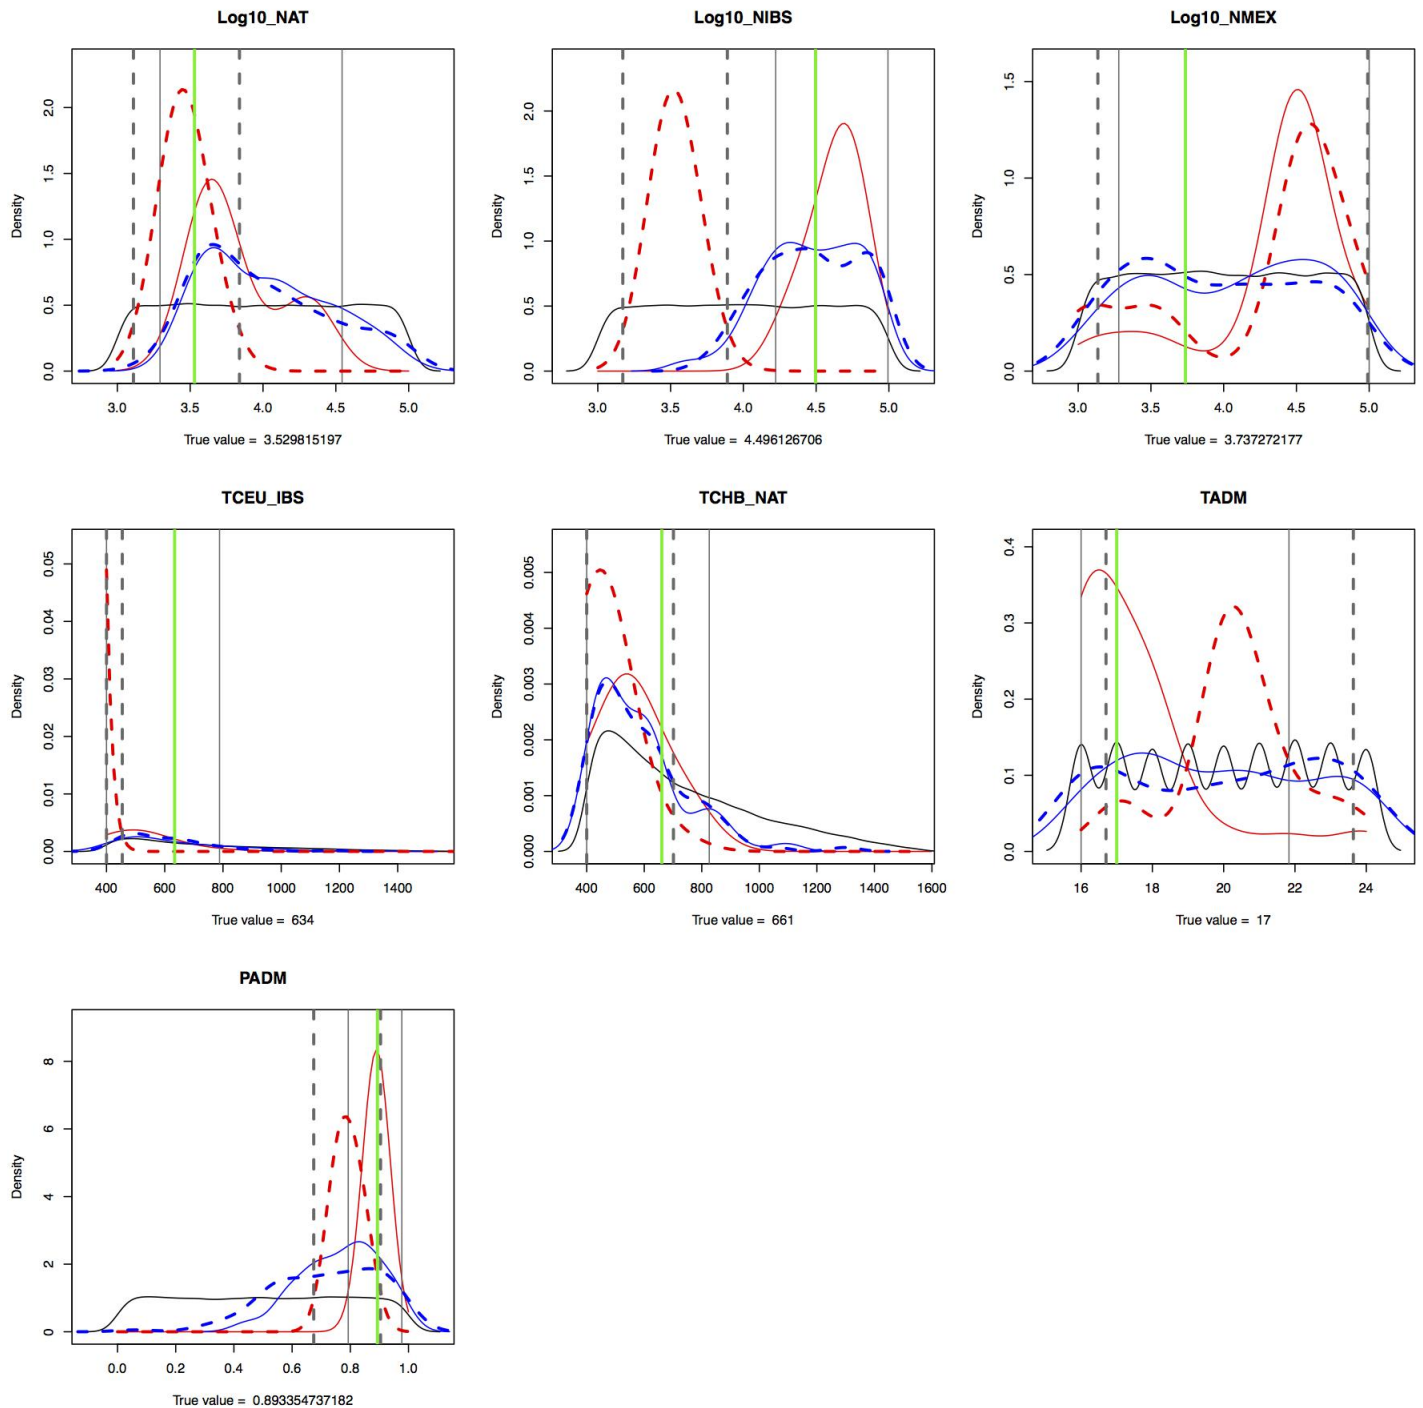

**Supplementary Figure S14. Comparison of the inferred posterior distributions of the parameters of the Mexican admixture model using simulated data.** Same color legend as Figure S11. The green vertical lines represent this time the true value of each of the parameters. Dash lines correspond to Wollstein's method and solid lines to our pipeline.

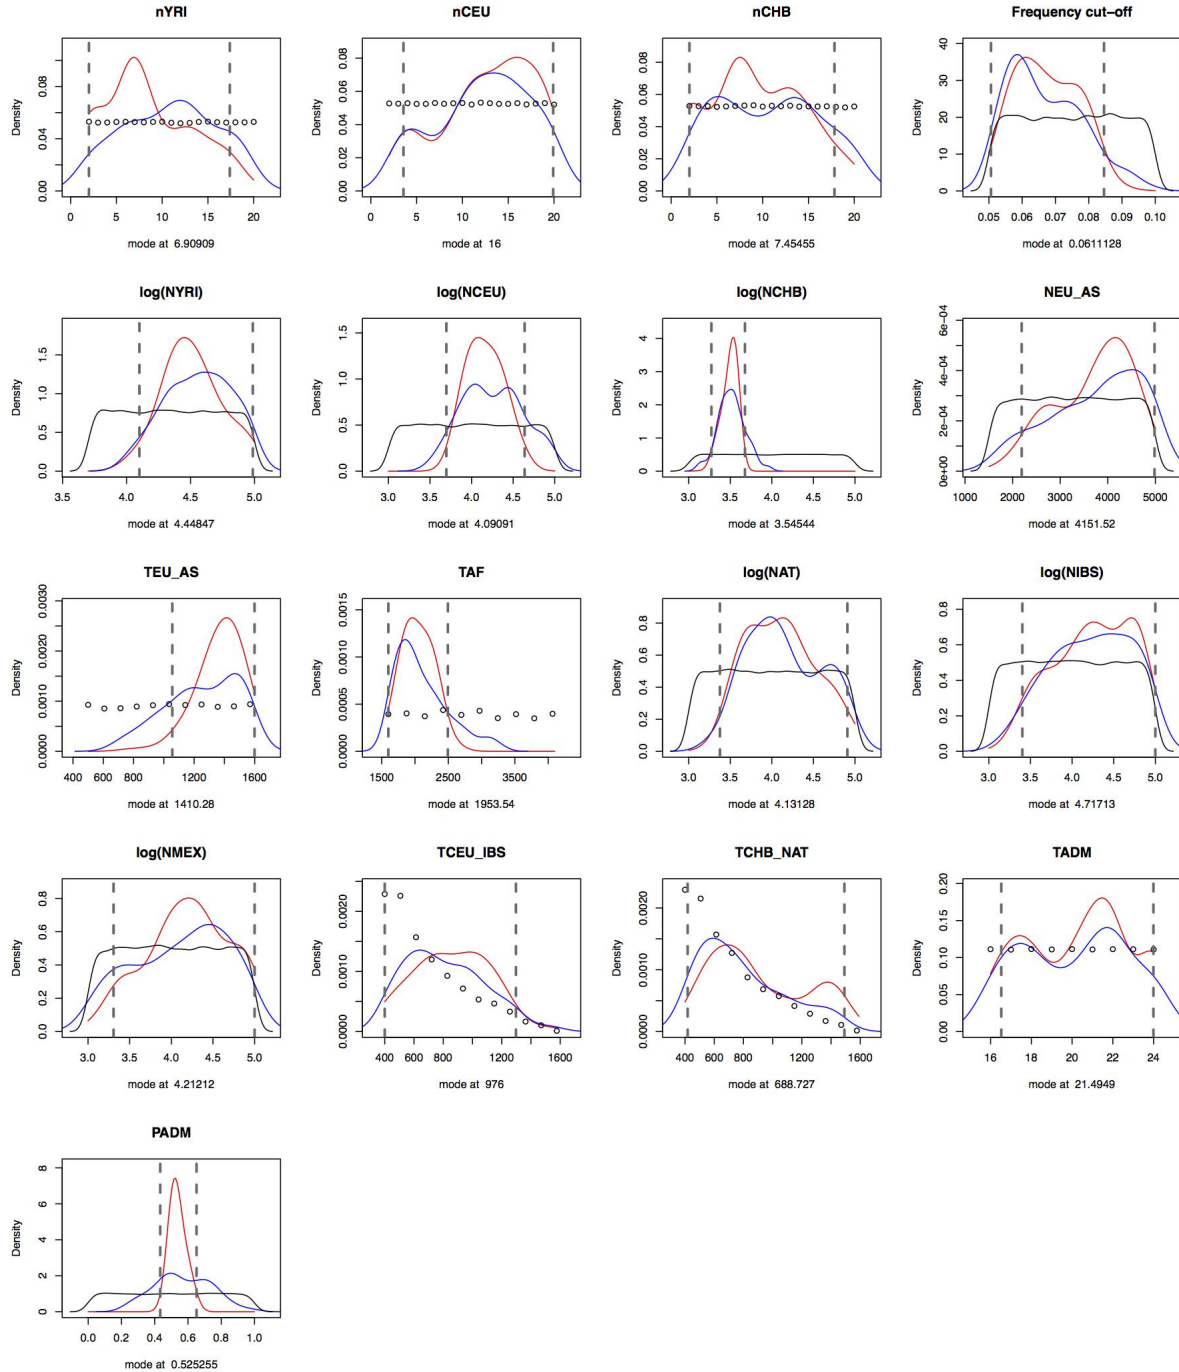

**Supplementary Figure S15. Posterior distributions of the discovery set and demographic parameters as estimated from the Mexican admixture model using observed data.** The black curve corresponds to the prior distribution of the parameter values, while the blue one is the truncated prior distribution. The truncated prior distribution is the distribution of the parameters kept after the rejection process (part of ABCtoolbox’s method). The red curve is the posterior distribution, and the dashed lines are the 95% High Posterior Density Interval. These results were calculated using 8 PLS components and 100 retained simulations (out from 500,000 simulations).

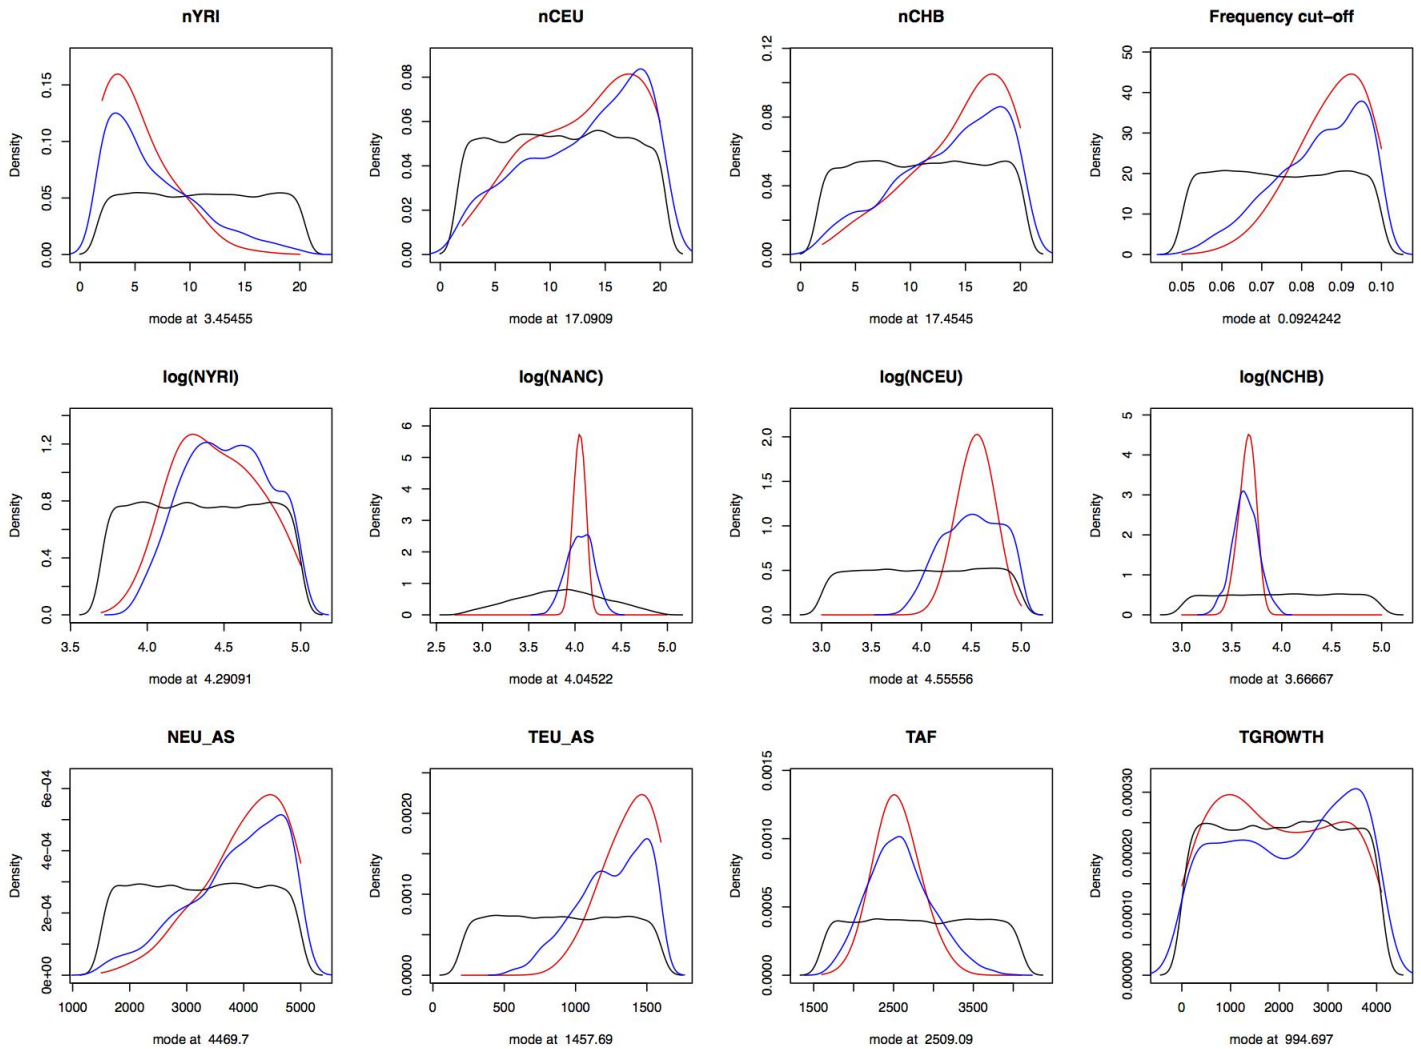

**Supplementary Figure S16. Posterior distributions of Out-of-Africa model when the time of population growth in Africans is estimated.** The posterior and truncated prior distributions of the time of growth in Africa have the same overall shape as the prior distribution, meaning that the simulations of the out-of-Africa model and our pipeline do not provide enough information to properly infer this particular parameter. Same color legend as Figure S15.

## 171 References

- 172 1. Arbiza, L., Zhong, E. & Keinan, A. Nre: a tool for exploring neutral loci in the human genome. *BMC Bioinforma.* **13**, 1–6 (2012).
- 173 2. Chen, G. K., Marjoram, P. & Wall, J. D. Fast and flexible simulation of DNA sequence data. *Genome Res.* **19**, 136–142 (2009).
- 174 3. Nachman, M. W. & Crowell, S. L. Estimate of the mutation rate per nucleotide in humans. *Genet.* **156**, 297–304 (2000).
- 175 4. International HapMap Consortium. A second generation human haplotype map of over 3.1 million SNPs. *Nat.* **449**, 851–861 (2007).
- 176 5. Wegmann, D., Leuenberger, C., Neuenschwander, S. & Excoffier, L. ABCtoolbox: a versatile toolkit for approximate Bayesian computations. *BMC*
- 177 *Bioinforma.* **11**, 1–7 (2010).
- 178 6. Boulesteix, A.-L. & Strimmer, K. Partial least squares: a versatile tool for the analysis of high-dimensional genomic data. *Briefings Bioinforma.* **8**, 32–44
- 179 (2007).
- 180 7. Wegmann, D., C, L. & L, E. Efficient Approximate Bayesian Computation coupled with Markov Chain Monte Carlo without likelihood. *Genet.* **18**,
- 181 1207–1218 (2009).
- 182 8. Leuenberger, C. & Wegmann, D. Bayesian computation and model selection without likelihoods. *Genet.* **184**, 243–252 (2010).
- 183 9. Chang, C. C. *et al.* Second-generation PLINK: rising to the challenge of larger and richer datasets. *GigaScience* **4**, 1–16 (2015).
- 184 10. Price, A. L. *et al.* Principal components analysis corrects for stratification in genome-wide association studies. *Nat. Genet.* **38**, 904–909 (2006).
- 185 11. Alexander, D. H., Novembre, J. & Lange, K. Fast model-based estimation of ancestry in unrelated individuals. *Genome Res.* **19**, 1655–1664 (2009).
- 186 12. Wollstein, A. *et al.* Demographic history of Oceania inferred from genome-wide data. *Curr. Biol.* **20**, 1983–1992 (2010).
- 187 13. Drmanac, R. *et al.* Human genome sequencing using unchained base reads on self-assembling DNA nanoarrays. *Sci.* **327**, 78–81 (2009).
- 188 14. The 1000 Genomes Project Consortium. An integrated map of genetic variation from 1,092 human genomes. *Nat.* **491**, 56–65 (2012).
- 189 15. Moreno-Estrada, A. *et al.* The genetics of Mexico recapitulates Native American substructure and affects biomedical traits. *Sci.* **344**, 1280–1285 (2014).
